# Supplementary material for: Carborane radical anions: spectroscopic and electronic properties of a carborane radical anion with a 2n + 3 skeletal electron count
Source: Royal Society of Chemistry journal article supplement (doi:10.1039/b700110j), 2007-01-01
Supplement: b700110j.pdf [file b700110j.pdf]

## **Carborane Radical Anions: Spectroscopic and Electronic Properties of a Carborane Radical Anion with a $2n+3$ Skeletal Electron Count**

*Mark A. Fox,\* Carlo Nervi, Antonella Crivello and Paul J. Low\**

### **Supplementary Information**

**Figure S1.** Experimental and simulated cyclic voltammograms (CV) of **1** (page 2)

**Figure S2.** CV at scan rates of 0.05, 0.1, 0.2, 0.4 and 0.8 V/s of **1** (page 3)

**Table S1.** CV values for 1-(4-XC<sub>6</sub>H<sub>4</sub>)-2-Ph-1,2-C<sub>2</sub>B<sub>10</sub>H<sub>10</sub> series (page 3)

**Table S2.** Kinetic parameters for 1-(4-XC<sub>6</sub>H<sub>4</sub>)-2-Ph-1,2-C<sub>2</sub>B<sub>10</sub>H<sub>10</sub> series based on the simulated simple EE mechanism (page 4)

**Figure S3** EPR spectrum of [**1**]<sup>-</sup> (page 5)

NMR data for **1** and [**1**]<sup>2-</sup> (page 5)

Computational details (page 6)

**Figure S4.** Simulated and observed IR spectra for **1** and [**1**]<sup>-</sup> (page 7)

**Figure S5.** Observed and calculated UV spectra for radical anion [**1**]<sup>-</sup>. (page 8)

**Figure S6.** Cage numbering for **1** and [**1**]<sup>-</sup>. (page 9)

Cartesian coordinates for optimised geometries of **1** and [**1**]<sup>-</sup>. (pages 9 and 10)

---

\* Dr M.A. Fox, Dr P.J. Low, Chemistry Department, Durham University Science Laboratories, South Road, Durham, DH1 3LE, U.K. Fax: (+44) 191 384 4737. E-mail: m.a.fox@durham.ac.uk, p.j.low@durham.ac.uk. Dr C. Nervi, A. Crivello Department of Chemistry IFM, University of Torino, via P. Giuria 7, 10125 Torino, Italy.

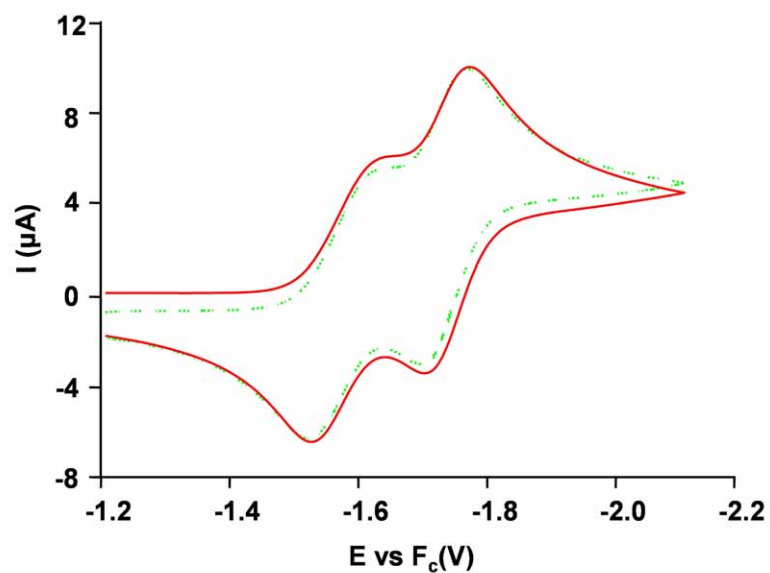

**Figure S1.** Experimental (green) and simulated (red) cyclic voltammograms (100 mV/s, 3M KCl calomel electrode, glassy carbon working electrode, Pt wire auxiliary,  $E_{Fc/Fc^+} = 0.395$  V) of **1** in MeCN / 0.1M  $NBu_4PF_6$ .

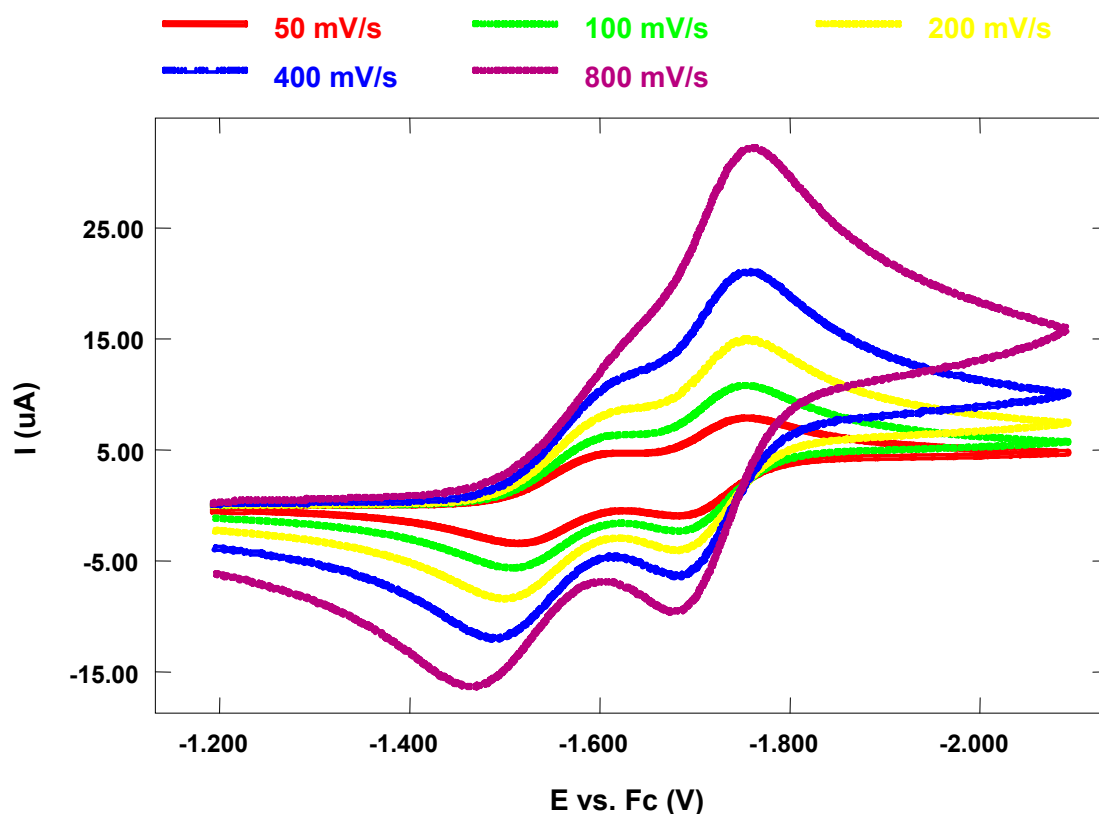

**Figure S2.** CV at scan rates of 0.05, 0.1, 0.2, 0.4 and 0.8 V/s of 1,2-diphenyl-*ortho*-carborane (**1**) in MeCN / 0.1M NBu<sub>4</sub>PF<sub>6</sub> at a GC electrode.

**Table S1.** Cyclovoltammetry values, in MeCN at 0.2 V/s, for 1-(4-XC<sub>6</sub>H<sub>4</sub>)-2-Ph-1,2-C<sub>2</sub>B<sub>10</sub>H<sub>10</sub>.

| X                | E <sub>p</sub> <sup>c</sup> (V) | E <sub>p</sub> <sup>a</sup> (V) | E <sub>1/2</sub> (V) | ΔE <sub>p</sub> (mV) |
|------------------|---------------------------------|---------------------------------|----------------------|----------------------|
| H( <b>1</b> )    | -1.63                           | -1.50                           | -1.56                | 123                  |
|                  | -1.76                           | -1.68                           | -1.73                | 75                   |
| F                | -1.61                           | -1.48                           | -1.53                | 125                  |
|                  | -1.72                           | -1.65                           | -1.69                | 71                   |
| NMe <sub>2</sub> | -1.70                           | -1.62                           | -1.66                | 84                   |
|                  | -1.82                           | -1.75                           | -1.79                | 72                   |
| NH <sub>2</sub>  | -1.71                           | -1.61                           | -1.65                | 95                   |
|                  | -1.82                           | -1.75                           | -1.79                | 74                   |
| OMe              | -1.65                           | -1.55                           | -1.60                | 98                   |
|                  | -1.78                           | -1.71                           | -1.75                | 72                   |
| OH               | -1.66                           | -1.57                           | -1.61                | 90                   |
|                  | -1.78                           | -1.71                           | -1.75                | 70                   |

**Table S2.** Kinetic parameters for 1-(4-XC<sub>6</sub>H<sub>4</sub>)-2-Ph-1,2-C<sub>2</sub>B<sub>10</sub>H<sub>10</sub> based on the simulated simple EE mechanism

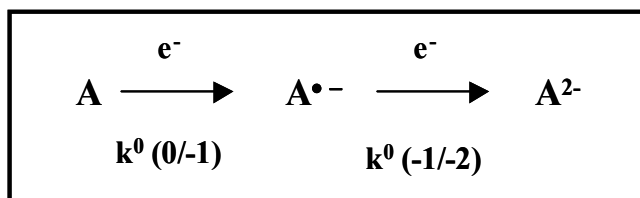

| X                | $k^0(0/-1)$<br>(cm/s) | $k^0(-1/-2)$<br>(cm/s) | $\alpha(0/-1)$ | $\alpha(-1/-2)$ |
|------------------|-----------------------|------------------------|----------------|-----------------|
| NMe <sub>2</sub> | $2.0 \cdot 10^{-2}$   | $1.0 \cdot 10^{-1}$    | 0.4            | 0.3             |
| NH <sub>2</sub>  | $1.2 \cdot 10^{-2}$   | $1.1 \cdot 10^{-1}$    | 0.4            | 0.4             |
| OMe              | $1.2 \cdot 10^{-2}$   | $5.0 \cdot 10^{-2}$    | 0.4            | 0.4             |
| OH               | $2.2 \cdot 10^{-2}$   | $1.6 \cdot 10^{-1}$    | 0.7            | 0.4             |
| H                | $4.0 \cdot 10^{-3}$   | $3.8 \cdot 10^{-2}$    | 0.4            | 0.35            |
| F                | $6.0 \cdot 10^{-3}$   | $4.0 \cdot 10^{-2}$    | 0.35           | 0.3             |

**Figure S3** EPR spectrum of  $1^-$  as potassium salt in solid state.

Bruker ESP 300E instrument, microwave frequency 9.434 GHz, gain  $5 \times 10^4$ , modulation amplitude 1.0 Gauss, modulation frequency 100 KHz, sweep time 21s, 64 scans.

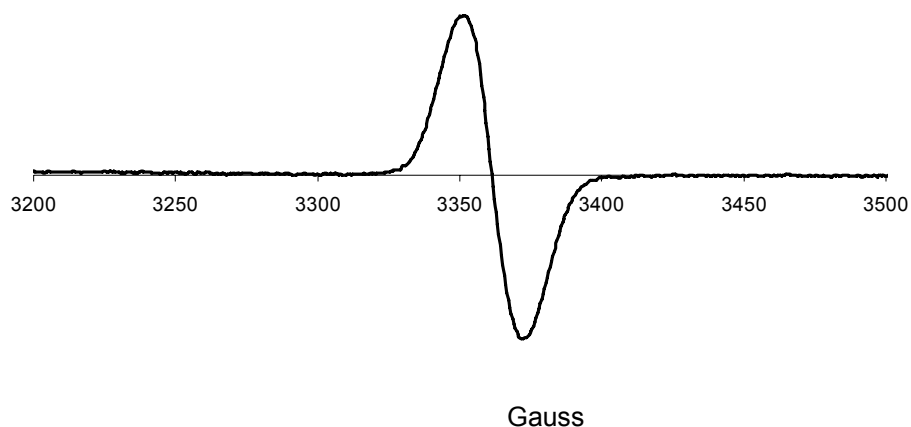

NMR data for **1** in  $d_8$ -THF

$^{11}\text{B}$  (128 MHz, ppm): -2.8 (d, 2B), -9.3 (d, 4B), -10.8 (d, 2B), -13.1 (d, 2B)

$^1\text{H}\{^{11}\text{B}\}$  (400 MHz, ppm): 7.55 (d, 4H), 7.28 (t, 2H), 7.20 (t, 4H), 3.36 (s, 2H, BH), 2.55 (s, 6H, BH), 2.37 (s, 2H, BH)

$^{13}\text{C}\{^1\text{H}\}$  (100 MHz, ppm): 130.9, 130.8, 130.4, 128.4, 85.8 (br, cage C)

NMR data for  $1^{2-}$  as sodium salt in  $d_8$ -THF

$^{11}\text{B}$  (128 MHz, ppm): 3.74 (d, 2B), -11.2 (d, 2B), -17.7 (d, 4B), -30.3 (d, 2B)

$^1\text{H}\{^{11}\text{B}\}$  (400 MHz, ppm): 7.33 (d, 4H), 6.90 (t, 4H), 6.67 (t, 2H), 3.38 (s, 2H, BH), 2.42 (s, 2H, BH), 1.28 (s, 4H, BH), 0.38 (s, 2H, BH)

$^{13}\text{C}\{^1\text{H}\}$  (100 MHz, ppm): 154.7, 126.9, 126.0, 120.0, 81.2 (br, cage C)

### Computational Details

All computations were carried out using the GAUSSIAN03 package.<sup>1</sup> The geometries of 1,2-Ph<sub>2</sub>-1,2-C<sub>2</sub>B<sub>10</sub>H<sub>10</sub> (**1**) and [1,2-Ph<sub>2</sub>-1,2-C<sub>2</sub>B<sub>10</sub>H<sub>10</sub>]<sup>-</sup> (**[1]**) were optimised without symmetry constraints at the B3LYP/6-31G\* level of theory. Frequency calculations on these geometries revealed no imaginary frequencies. The starting geometry used for **1** and **[1]** was the X-ray crystal structure of **1**.<sup>2</sup> Other starting geometries of the radical anion [1,2-Ph<sub>2</sub>-1,2-C<sub>2</sub>B<sub>10</sub>H<sub>10</sub>]<sup>-</sup> based on open-face geometries gave minima with energies much higher than the optimised geometry of **[1]** discussed here. TD-DFT computations were carried out at the B3LYP/6-31G\* level of theory.

---

1. Gaussian 03, Revision C.02, M. J. Frisch, G. W. Trucks, H. B. Schlegel, G. E. Scuseria, M. A. Robb, J. R. Cheeseman, J. A. Montgomery, Jr., T. Vreven, K. N. Kudin, J. C. Burant, J. M. Millam, S. S. Iyengar, J. Tomasi, V. Barone, B. Mennucci, M. Cossi, G. Scalmani, N. Rega, G. A. Petersson, H. Nakatsuji, M. Hada, M. Ehara, K. Toyota, R. Fukuda, J. Hasegawa, M. Ishida, T. Nakajima, Y. Honda, O. Kitao, H. Nakai, M. Klene, X. Li, J. E. Knox, H. P. Hratchian, J. B. Cross, C. Adamo, J. Jaramillo, R. Gomperts, R. E. Stratmann, O. Yazyev, A. J. Austin, R. Cammi, C. Pomelli, J. W. Ochterski, P. Y. Ayala, K. Morokuma, G. A. Voth, P. Salvador, J. J. Dannenberg, V. G. Zakrzewski, S. Dapprich, A. D. Daniels, M. C. Strain, O. Farkas, D. K. Malick, A. D. Rabuck, K. Raghavachari, J. B. Foresman, J. V. Ortiz, Q. Cui, A. G. Baboul, S. Clifford, J. Cioslowski, B. B. Stefanov, G. Liu, A. Liashenko, P. Piskorz, I. Komaromi, R. L. Martin, D. J. Fox, T. Keith, M. A. Al-Laham, C. Y. Peng, A. Nanayakkara, M. Challacombe, P. M. W. Gill, B. Johnson, W. Chen, M. W. Wong, C. Gonzalez, and J. A. Pople, Gaussian, Inc., Wallingford CT, 2004.

2. Z.G. Lewis and A.J. Welch, *Acta Cryst. C*, 1993, **49**, 705.

**Figure S4.** Simulated IR spectra (upper) for neutral **1** and radical anion [**1**]<sup>•-</sup> compared with experimental (lower i.e. Figure 1 in manuscript)

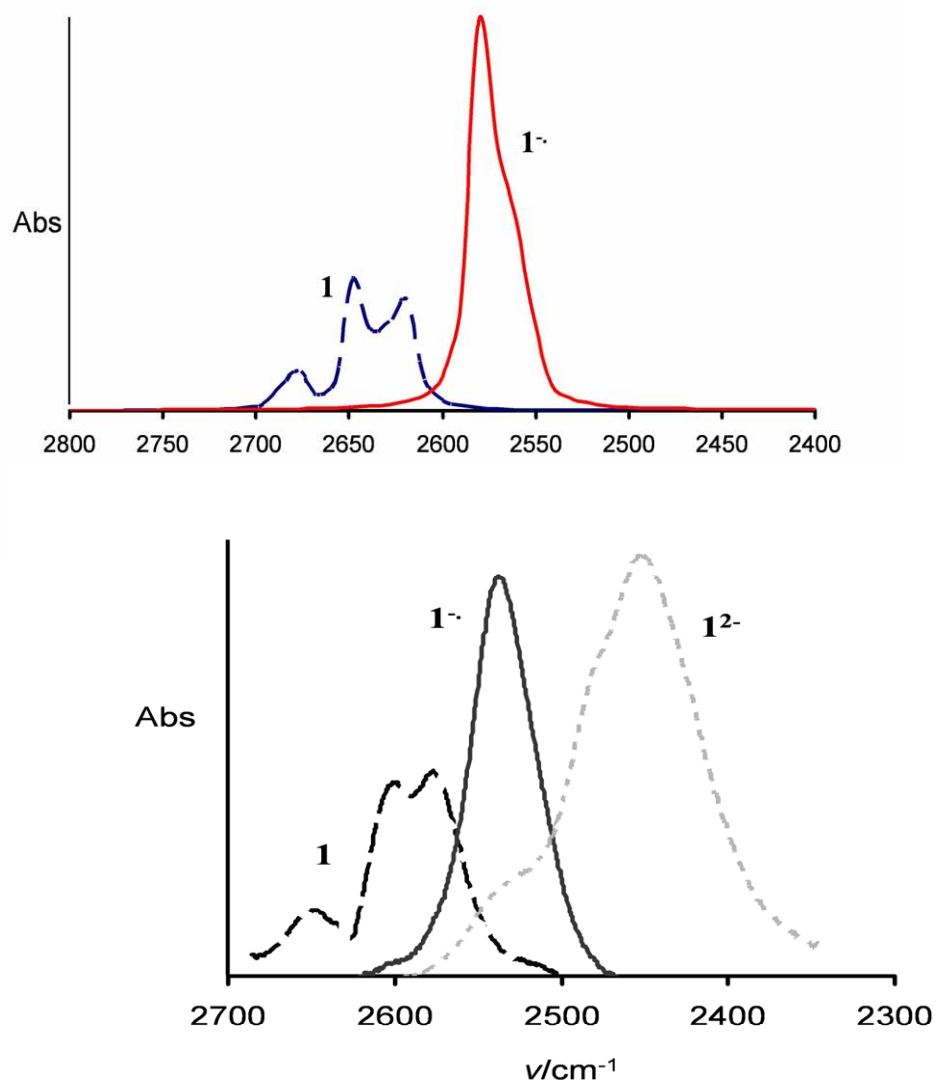

**Figure S5.** Observed and TD-DFT calculated (stick) UV spectra for radical anion [1]<sup>-</sup>.

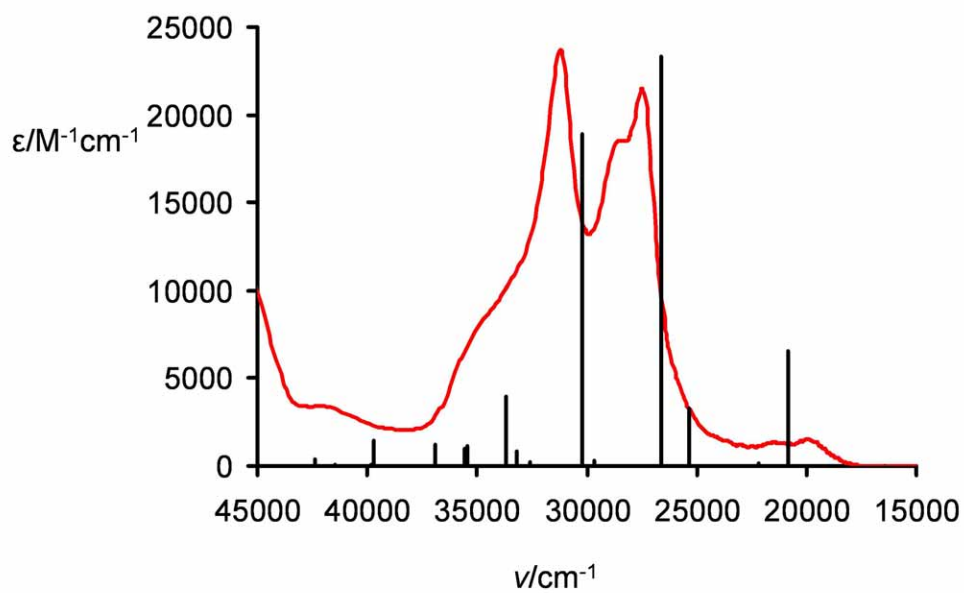



**Figure S6.** Cage numbering for **1** and **[1]<sup>-</sup>**

The radical anion **[1]<sup>-</sup>** is numbered in the same way as the neutral carborane **1**. The *exo*-anions **[1-X-2-Ph-1,2-C<sub>2</sub>B<sub>10</sub>H<sub>10</sub>]<sup>-</sup>** structurally related to **[1]<sup>-</sup>** are also numbered similarly (*Dalton Trans.* 2004, 2786).

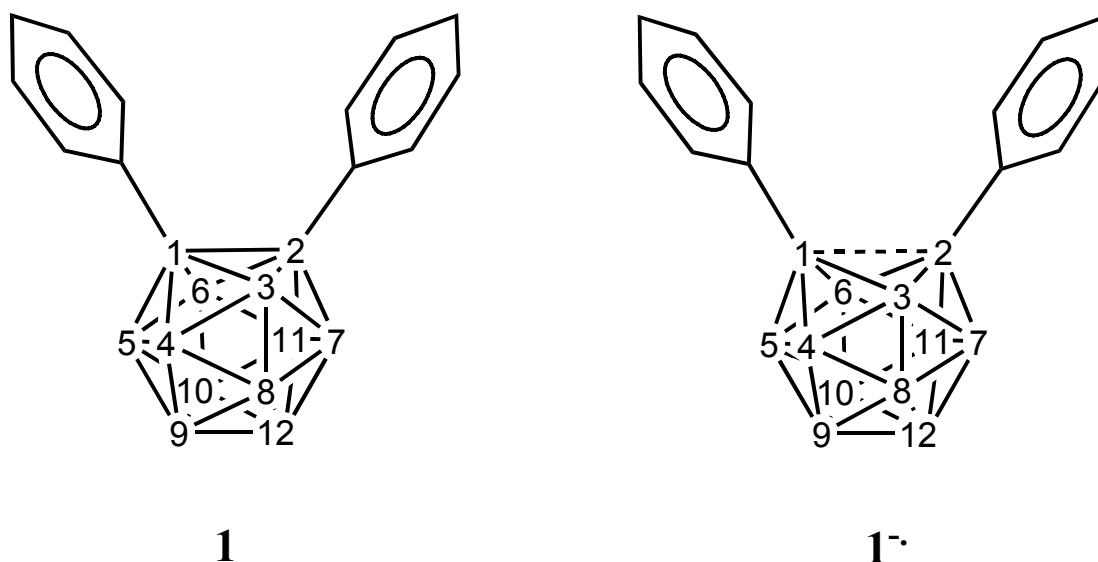

Cartesian coordinates for **1** and **[1]<sup>-</sup>**.

```
44
C14H20B10 << C1 >> E(RB+HF-LYP) / 6-31G(d) = -794.199646447 C= 0
C 0.586510 -1.624765 0.055279
C 0.586446 1.624791 -0.055242
C -0.724485 -0.880734 0.039316
C -0.724523 0.880713 -0.039358
C 1.277495 -1.854648 1.254456
B -1.178564 -0.058265 -1.409015
B -2.071277 -1.478142 -0.823106
C 2.470694 2.575438 -1.261286
C 1.114330 -2.154635 -1.132559
B -2.073330 -1.405396 0.949709
B -1.178620 0.058228 1.408960
C 1.277759 1.854217 -1.254315
C 2.992359 -3.086633 0.073304
C 1.113915 2.155157 1.132534
B -2.071381 1.478059 0.823012
B -2.944188 0.060865 1.441893
B -2.944127 -0.060987 -1.442018
B -3.509599 -0.887733 0.037506
B -3.509638 0.887585 -0.037656
C 2.306023 -2.877199 -1.122949
C 2.992239 3.086752 -0.073177
C 2.305577 2.877770 1.122968
B -2.073354 1.405317 -0.949799
C 2.470457 -2.575823 1.261473
H -0.454201 0.107262 2.337420
H -4.504009 1.536600 -0.063561
H -4.503942 -1.536793 0.063371
H -3.518706 -0.107958 -2.480347
```

# Supplementary Material (ESI) for Chemical Communications  
# This journal is (c) The Royal Society of Chemistry 2007

H -1.920761 2.380633 -1.605006  
H -0.454131 -0.107253 -2.337468  
H -1.920727 -2.380709 1.604916  
H -1.924158 -2.505827 -1.393692  
H -3.518813 0.107810 2.480198  
H -1.924345 2.505754 1.393601  
H 0.882216 1.479106 -2.190009  
H 0.587446 -2.014235 -2.068914  
H 3.921544 -3.649594 0.080583  
H 0.586777 2.015107 2.068798  
H 3.921400 3.649753 -0.080424  
H 0.881673 -1.479933 2.190190  
H 2.693320 3.280418 2.054437  
H 2.988239 -2.740673 2.202145  
H 2.988735 2.739926 -2.201877  
H 2.694046 -3.279452 -2.054472

44

C14H20B10(1-,2) << C1 >> E(UB+HF-LYP) / 6-31G(d) = -794.254199713 C= 0  
C -1.195307 0.674147 0.000136  
C 1.195242 0.674119 -0.000086  
B 0.000125 0.956947 1.220003  
B -1.496402 2.009675 0.898098  
B -1.496552 2.009633 -0.897823  
B -0.000074 0.956986 -1.219943  
B 1.496562 2.009642 0.897833  
B 0.000133 2.774412 1.434332  
B -0.880284 3.414771 0.000064  
B -0.000114 2.774373 -1.434335  
B 1.496421 2.009612 -0.898087  
B 0.880319 3.414761 -0.000126  
C -2.033204 -0.537071 0.000143  
C 2.033167 -0.537097 -0.000130  
H 0.000221 0.235952 2.168461  
H -2.468015 1.986066 1.589075  
H -2.468280 1.986008 -1.588634  
H -0.000197 0.235997 -2.168413  
H 2.468282 1.985995 1.588653  
H 0.000249 3.341647 2.485559  
H -1.490810 4.441649 0.000065  
H -0.000197 3.341581 -2.485577  
H 2.468021 1.985940 -1.589074  
H 1.490869 4.441625 -0.000147  
C -3.664813 -2.856738 0.000121  
C 3.664828 -2.856729 -0.000148  
C -3.256747 -2.275474 1.203896  
C 3.257500 -2.274948 1.203627  
C -2.455176 -1.136790 1.205201  
C 2.455907 -1.136280 1.204928  
C -3.257498 -2.274926 -1.203645  
C 3.256747 -2.275452 -1.203911  
C -2.455932 -1.136240 -1.204929  
C 2.455152 -1.136784 -1.205196  
H -3.565909 -2.712353 2.151580  
H 3.567292 -2.711382 2.151310  
H -2.147575 -0.694672 2.147219  
H 2.148920 -0.693730 2.146945  
H -3.567281 -2.711352 -2.151335  
H 3.565916 -2.712307 -2.151604  
H -2.148949 -0.693664 -2.146934  
H 2.147541 -0.694660 -2.147208  
H -4.289120 -3.747423 0.000113  
H 4.289154 -3.747400 -0.000157
